# Supplementary material for: Facility-level CKD-MBD composite score and risk of adverse clinical outcomes among patients on hemodialysis
Source: Springer Nature journal article supplement (doi:10.1186/s12882-016-0382-8), 2016-11-04
Supplement: MOESM1 [file 11019808]

|                                           |               |               |               |               |               |               |               |               |               |               |               |
|-------------------------------------------|---------------|---------------|---------------|---------------|---------------|---------------|---------------|---------------|---------------|---------------|---------------|
| 0                                         | 43.8          | 45.5          | 43.4          | 43.4          | 43.8          | 43.4          | 45.6          | 43.9          | 42.2          | 45.0          | 42.8          |
| 1-4                                       | 12.5          | 12.5          | 12.7          | 12.2          | 12.3          | 12.8          | 11.9          | 12.5          | 12.2          | 12.5          | 13.1          |
| 5-10                                      | 15.5          | 15.1          | 15.8          | 15.5          | 15.5          | 15.5          | 15.7          | 15.4          | 16.4          | 15.2          | 14.9          |
| ≥ 11                                      | 28.2          | 26.9          | 28.1          | 28.9          | 28.4          | 28.3          | 26.8          | 28.2          | 29.1          | 27.3          | 29.3          |
| Comorbidity, %                            |               |               |               |               |               |               |               |               |               |               |               |
| ASHD                                      | 42.1          | 47.5          | 44.2          | 42.2          | 40.0          | 38.0          | 47.1          | 43.0          | 44.6          | 38.6          | 38.2          |
| CHF                                       | 48.5          | 49.3          | 50.9          | 47.7          | 48.1          | 46.4          | 49.3          | 49.4          | 50.2          | 45.8          | 47.6          |
| CVA/TIA                                   | 17.5          | 17.3          | 17.8          | 17.9          | 17.6          | 16.6          | 18.0          | 17.6          | 17.9          | 16.4          | 17.4          |
| PVD                                       | 36.3          | 38.6          | 38.0          | 35.8          | 36.1          | 33.7          | 37.9          | 37.0          | 38.0          | 35.6          | 33.1          |
| Other cardiac                             | 28.1          | 29.0          | 29.3          | 27.2          | 27.2          | 28.3          | 28.6          | 27.8          | 29.5          | 27.3          | 27.4          |
| COPD                                      | 21.4          | 22.0          | 21.7          | 21.7          | 21.0          | 20.7          | 21.5          | 22.3          | 22.1          | 20.2          | 20.9          |
| GI bleeding                               | 5.9           | 5.4           | 5.7           | 6.2           | 6.1           | 6.1           | 5.6           | 5.7           | 6.4           | 5.6           | 6.1           |
| Liver disease                             | 2.6           | 2.7           | 2.9           | 2.3           | 2.7           | 2.5           | 2.5           | 3.0           | 2.6           | 2.6           | 2.3           |
| Dysrhythmia                               | 25.3          | 27.9          | 26.2          | 25.8          | 24.0          | 23.5          | 27.8          | 24.9          | 26.9          | 23.8          | 23.9          |
| Cancer                                    | 9.1           | 10.1          | 9.9           | 9.5           | 8.3           | 7.7           | 9.6           | 9.7           | 9.7           | 8.7           | 7.6           |
| Diabetes                                  | 63.4          | 64.7          | 66.3          | 63.7          | 62.7          | 60.0          | 64.4          | 66.1          | 65.0          | 60.8          | 60.8          |
| Previous CV hospitalization               | 25.3          | 24.3          | 25.7          | 26.1          | 25.4          | 24.8          | 24.0          | 24.9          | 26.5          | 24.5          | 26.4          |
| Previous PTX                              | 0.7           | 0.4           | 0.4           | 0.8           | 0.7           | 1.0           | 0.4           | 0.6           | 0.6           | 0.9           | 0.7           |
| Laboratory values, mean (SD) <sup>a</sup> |               |               |               |               |               |               |               |               |               |               |               |
| Phosphate, mg/dl                          | 5.3(1.3)      | 5.1 (1.2)     | 5.2 (1.3)     | 5.3 (1.3)     | 5.3 (1.3)     | 5.5 (1.4)     | 5.0 (1.2)     | 5.1 (1.3)     | 5.3 (1.3)     | 5.4 (1.3)     | 5.5 (1.4)     |
| Calcium, mg/dl                            | 9.0 (0.6)     | 9.1 (0.5)     | 9.0 (0.5)     | 9.0 (0.6)     | 9.0 (0.6)     | 8.9 (0.6)     | 9.0 (0.5)     | 9.0 (0.5)     | 9.0 (0.6)     | 9.0 (0.6)     | 9.0 (0.6)     |
| PTH, pg/ml                                | 341.7 (320.3) | 287.8 (250.1) | 311.7 (267.0) | 331.2 (301.0) | 360.6 (343.2) | 405.2 (393.4) | 274.8 (214.3) | 308.5 (265.2) | 333.8 (320.3) | 367.6 (360.4) | 412.7 (378.6) |

Quintiles of facility level proportion of CKD-MBD composite score was based on proportions of patients at each facility who were out of or above target. “Out of target” was characterized by at least two CKD-MBD laboratory values above or below defined target ranges for PTH, calcium, and phosphate. “Above target” was characterized by at least two CKD-MBD laboratory values above defined target ranges for PTH, calcium, and phosphate. Target ranges for CKD-MBD laboratory values were 150-300 pg/ml for PTH, 8.4-10.2 mg/dL for calcium, and 3.5-5.5 mg/dL for phosphate.

Abbreviations: ASHD, atherosclerotic heart disease; BMI, body mass index; CHF, congestive heart failure; CKD-MBD, chronic kidney disease-mineral bone disorder; COPD, chronic obstructive pulmonary disease; CV, cardiovascular; CVA/TIA, cerebrovascular accident/transient ischemic attack; ESRD, end-stage renal disease; GI gastrointestinal; PTH, parathyroid hormone; PTX, parathyroidectomy; PVD, peripheral vascular disease; Q, quintile; SD, standard deviation.

<sup>a</sup> Mean laboratory values ascertained during the 4-month baseline period.
